# Supplementary material for: Acid–base regulated inclusion complexes of β-cyclodextrin with 1-[2-(4-fluorophenyl)-2-oxoethyl]-4,4′-bipyridinium dichloride displaying multistimuli-responsive chromic behaviors and photomodulable fluorescence
Source: Royal Society of Chemistry journal article supplement (doi:10.1039/d3tc04555b), 2024-01-01
Supplement: d3tc04555b1.pdf [file d3tc04555b1.pdf]

## Electronic Supplementary Information (ESI)

### Acid–base regulated inclusion complexes of $\beta$ -cyclodextrin with 1-[2-(4-fluorophenyl)-2-oxoethyl]-4,4'-bipyridinium dichloride displaying multistimuli-responsive chromic behaviors and photomodulable fluorescence

Xiao-Feng Wang,<sup>a</sup> Chen-Yan Xu,<sup>a</sup> Rui-Lian Lin,<sup>\*a</sup> Wen-Qi Sun,<sup>a</sup> Ming-Fu Ye,<sup>\*a, b</sup> Li-Xin Xu,<sup>a</sup> and Jing-Xin Liu<sup>\*a</sup>

a. College of Chemistry and Chemical Engineering, Anhui University of Technology, Maanshan 243002, China. E-mail: lrl@ahut.edu.cn (R.L. Lin), jxliu411@ahut.edu.cn (J.X. Liu)

b. Anhui Province Key Laboratory of Chemistry for Inorganic/Organic Hybrid Functionalized Materials, Anhui University, Hefei 230601, China. Email: yehmf@iccas.ac.cn (M.F. Ye)

### Table of Contents

|                                                                                                                               |     |
|-------------------------------------------------------------------------------------------------------------------------------|-----|
| Figure S1. <sup>1</sup> H NMR, <sup>13</sup> C NMR, <sup>19</sup> F NMR and HRMS spectra of FOV·Cl <sub>2</sub> .....         | S2  |
| Figure S2. 2D Cosy NMR of FOV·Cl <sub>2</sub> and FHV·Cl.....                                                                 | S3  |
| Figure S3. ESI-MS spectra of FOV <sup>2+</sup> @ $\beta$ -CD.....                                                             | S4  |
| Figure S4. UV-vis titration spectra of FOV <sup>2+</sup> binding with $\beta$ -CD.....                                        | S5  |
| Figure S5. Photographs showing the reversible colour change.....                                                              | S6  |
| Figure S6. IR spectra of FOV <sup>2+</sup> @ $\beta$ -CD and FHV <sup>+</sup> @ $\beta$ -CD before and after irradiation..... | S7  |
| Figure S7. Solid-state UV-vis absorption spectra of FOV <sup>2+</sup> @ $\beta$ -CD before and after heating.....             | S8  |
| Figure S8. ESR spectra of FOV <sup>2+</sup> @ $\beta$ -CD and FHV <sup>+</sup> @ $\beta$ -CD before and after heating.....    | S9  |
| Figure S9. Photos of FHV <sup>2+</sup> @ $\beta$ -CD treated with ammonia or organic amine vapors.....                        | S10 |
| Figure S10. Energy minimized structures of FOV <sup>2+</sup> and FHV <sup>+</sup> .....                                       | S11 |

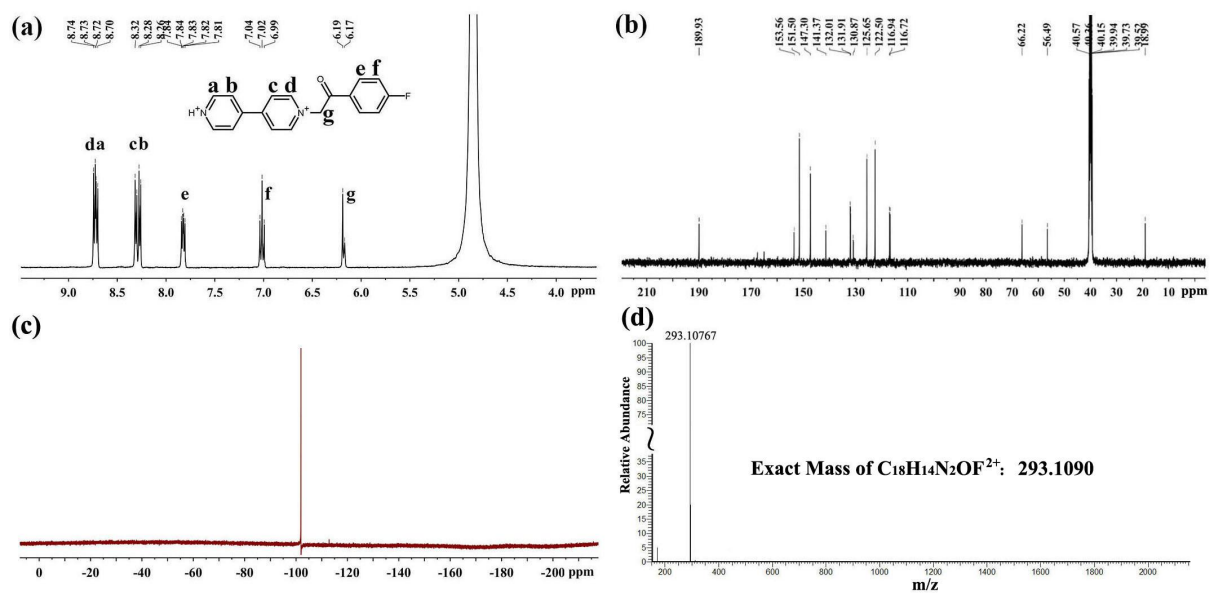

Figure S1. (a)  $^1\text{H}$  NMR (400 MHz,  $\text{D}_2\text{O}$ ), (b)  $^{13}\text{C}$  NMR (100 MHz,  $\text{DMSO-d}_6$ ), (c)  $^{19}\text{F}$  NMR (400 MHz,  $\text{D}_2\text{O}$ ) and (d) HRMS spectra of FOV· $\text{Cl}_2$ .

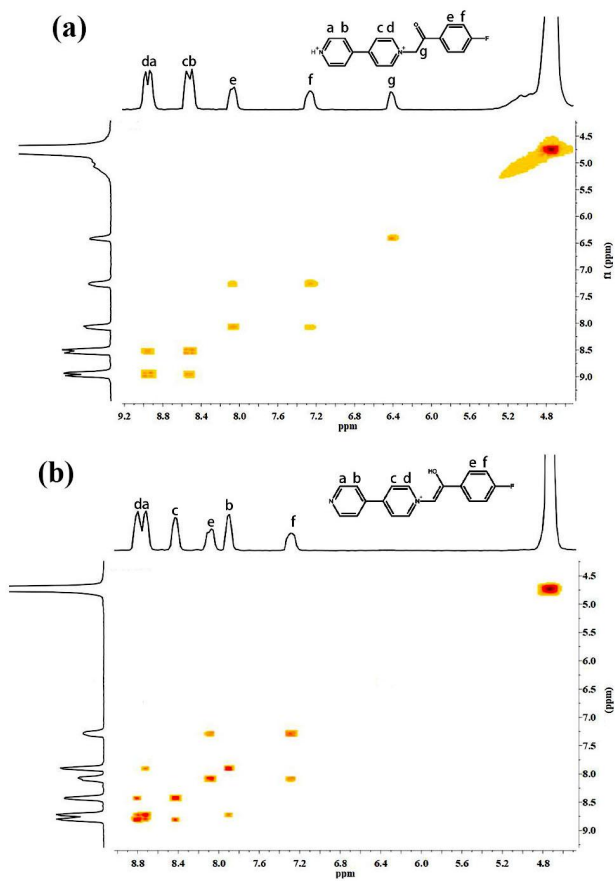

Figure S2. 2D Cosy NMR of FOV·Cl<sub>2</sub> and FHV·Cl.

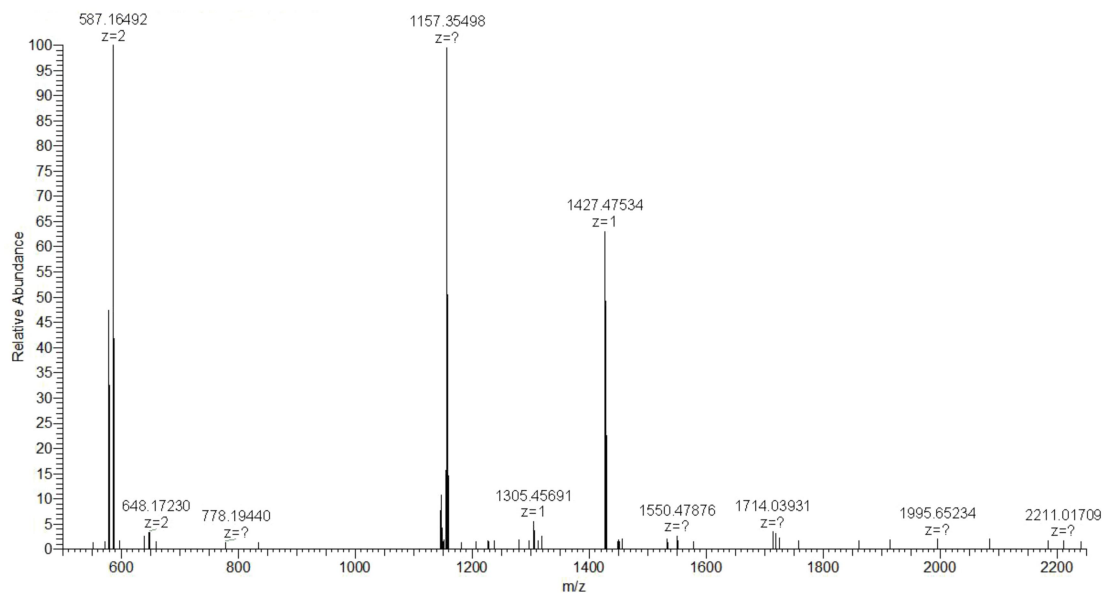

Figure S3. ESI-MS of inclusion complex FOV<sup>2+</sup>@β-CD. The peak found at m/z 1427.47534 corresponds to {FOV·Cl<sub>2</sub>+β-CD-Cl<sub>2</sub>} (calculated for {C<sub>18</sub>H<sub>14</sub>N<sub>2</sub>OF<sup>+</sup> +C<sub>42</sub>H<sub>70</sub>O<sub>35</sub>}, 1427.4788).

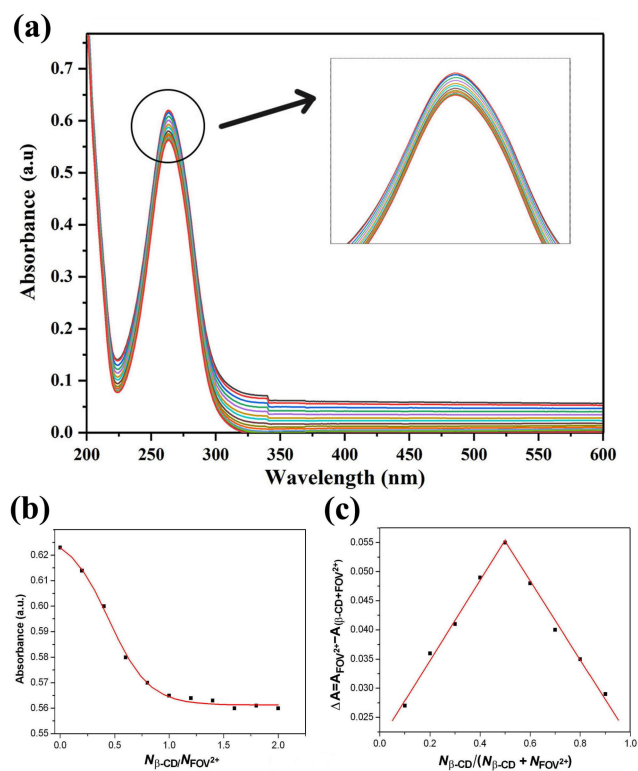

Figure S4. (a) Change in absorption spectra of  $\text{FOV}\cdot\text{Cl}_2$  ( $2.0 \times 10^{-5} \text{ mol}\cdot\text{L}^{-1}$ ) with increasing concentration of  $\beta$ -CD. (b) The curve of absorbance intensity vs.  $N_{\beta\text{-CD}}/N_{\text{FOV}\cdot\text{Cl}_2}$ . (c) Continuous variation Job's plot for the  $\beta$ -CD and  $\text{FOV}\cdot\text{Cl}_2$  on the basis of UV spectra.

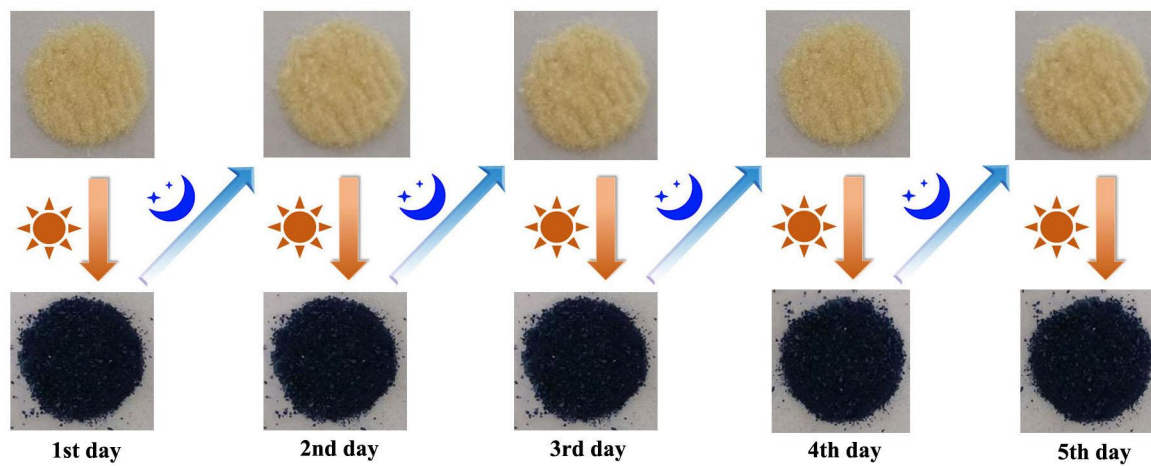

Figure S5. Photographs showing the reversible colour change can occur multiple times.

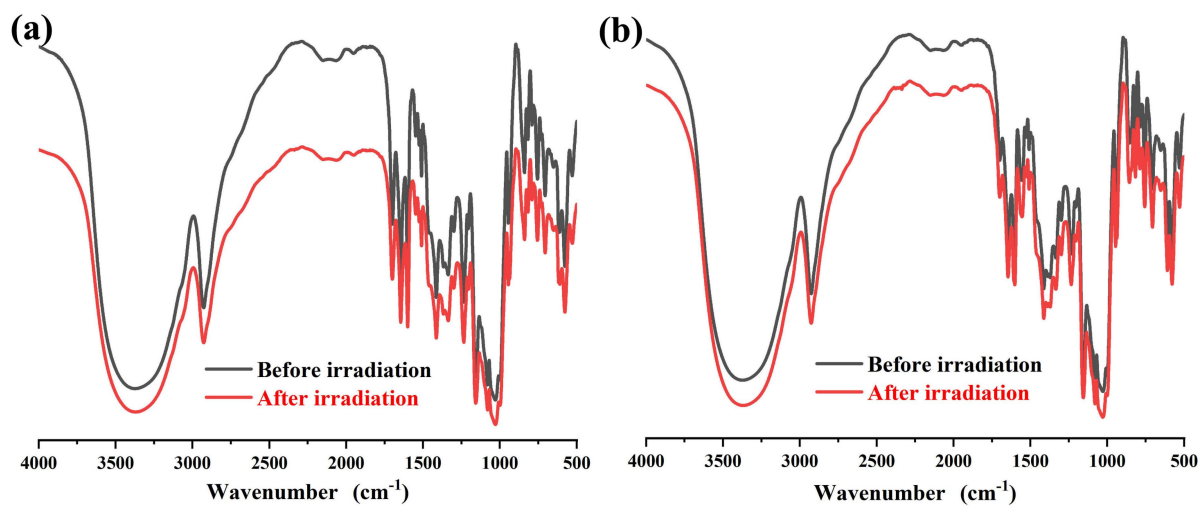

Figure S6. IR spectra of inclusion complexes (a) FOV<sup>2+</sup>@ $\beta$ -CD and (b) FHV<sup>+</sup>@ $\beta$ -CD before and after irradiation.

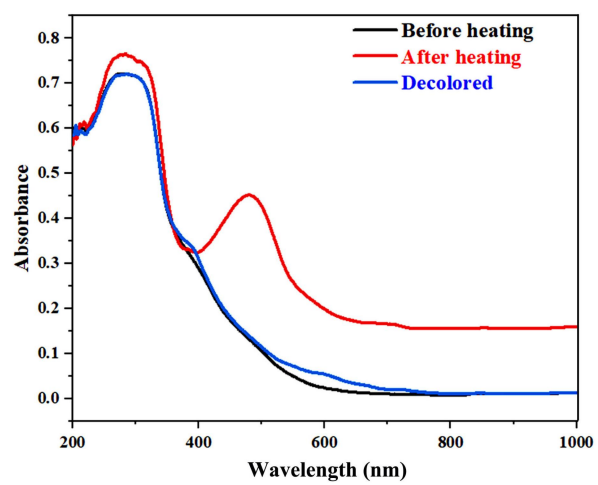

Figure S7. Solid-state UV-vis absorption spectra of FOV<sup>2+</sup>@β-CD before and after heating .



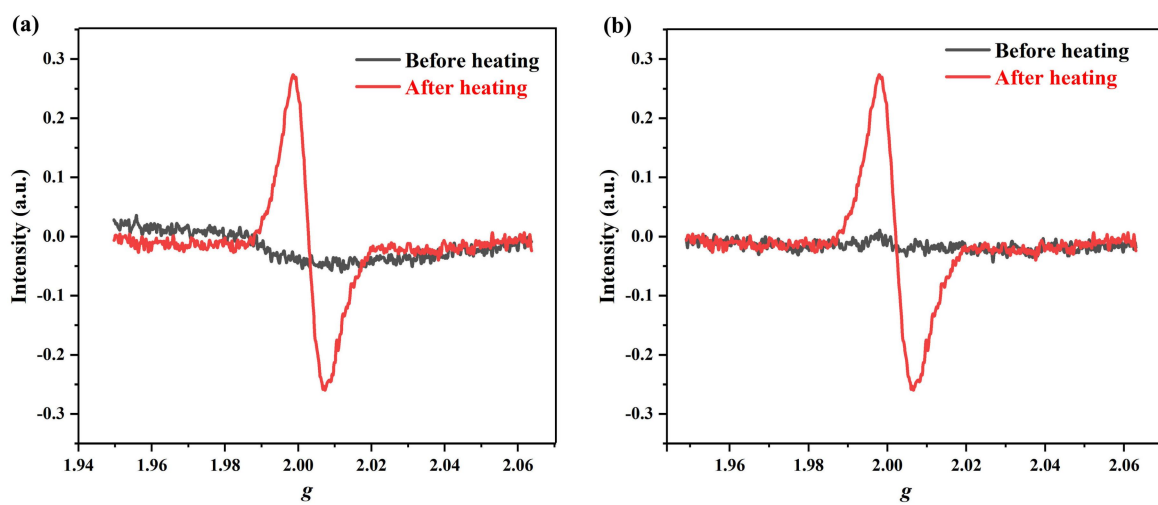

Figure S8. ESR spectra of the  $\text{FOV}^{2+}@ \beta\text{-CD}$  (a) and  $\text{FHV}^{+}@ \beta\text{-CD}$  (b) before and after heating.

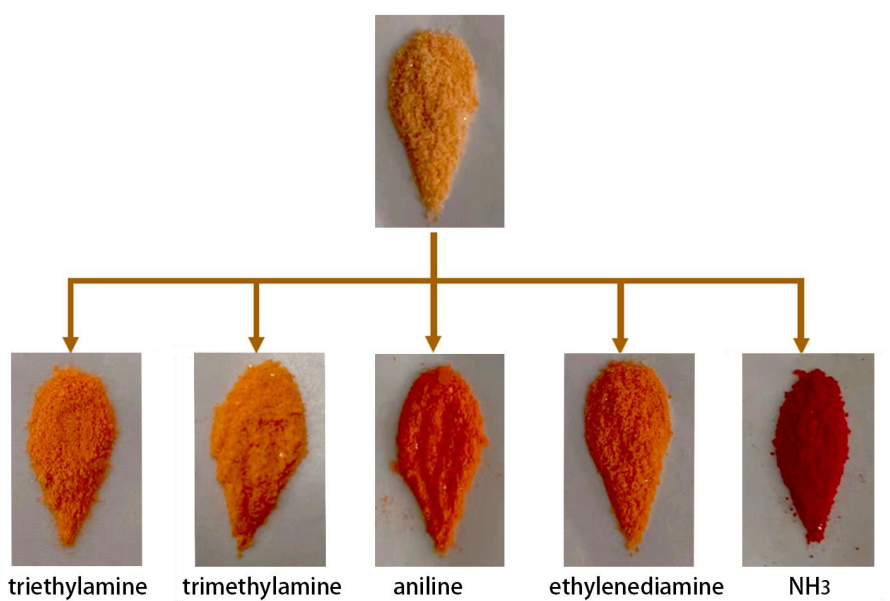

Figure S9. Photographs of the FHV<sup>2+</sup>@β-CD treated with vapors of ammonia and organic amines.

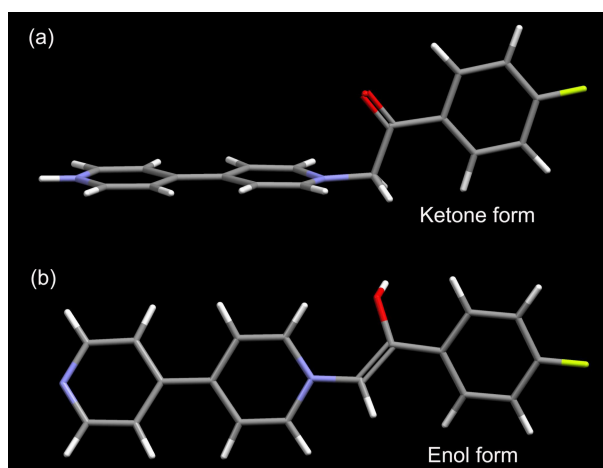

Figure S10. Energy minimized structures of  $\text{FOV}^{2+}$  (a) and  $\text{FHV}^+$  (b) in the gas phase.
